# Supplementary material for: Role of sea spray aerosol at the air-sea interface in transporting aromatic acids to the atmosphere
Source: Copernicus journal article supplement (doi:10.5194/egusphere-2023-2011), 2023-10-04
Supplement: Supplementary file 1 [file egusphere-2023-2011-supplement.pdf]

*Supplement of*

**Role of sea spray aerosol at the air-sea interface in transporting aromatic acids to the atmosphere**

**Yaru Song et al.**

*Correspondence to:* Lin Du (lindu@sdu.edu.cn)

**(6 Pages, 4 Table, 2 Figures)**

**Table S1.** Summary of experimental conditions.

| Exp. No. | Experiment type                   | pH   | Salinity (psu) | Sampling time (h) | RH (%) |
|----------|-----------------------------------|------|----------------|-------------------|--------|
| 1        | SW                                | 7.92 | 34.2           | 5                 | 35     |
| 2        | SW+benzoic acid                   | 7.72 | 34.3           | 5                 | 34     |
| 3        | SW+ <i>o</i> -hydroxybenzoic acid | 7.60 | 34.5           | 5                 | 36     |
| 4        | SW+ <i>m</i> -hydroxybenzoic acid | 7.68 | 34.1           | 5                 | 40     |
| 5        | SW+ <i>p</i> -hydroxybenzoic acid | 7.84 | 34.3           | 5                 | 38     |
| 6        | SW+ <i>o</i> -phthalic acid       | 7.58 | 34.2           | 5                 | 36     |
| 7        | SW+ <i>m</i> -phthalic acid       | 7.80 | 34.5           | 5                 | 37     |
| 8        | SW+ <i>p</i> -phthalic acid       | 7.85 | 34.4           | 5                 | 42     |
| 9        | SW+vanillic acid                  | 7.81 | 34.2           | 5                 | 43     |
| 10       | SW+syringic acid                  | 7.84 | 34.3           | 5                 | 39     |

**Table S2.** Octanol–water partitioning coefficients  $\log(Kow)$  and octanol–air partitioning coefficients  $\log(Koa)$  of aromatic carboxylic acids.

| aromatic carboxylic acids     | $\log(Kow)$ | $\log(Koa)$ |
|-------------------------------|-------------|-------------|
| benzoic acid                  | 1.87        | 5.91        |
| <i>o</i> -hydroxybenzoic acid | 2.26        | 7.44        |
| <i>m</i> -hydroxybenzoic acid | 1.5         | 8.08        |
| <i>p</i> -hydroxybenzoic acid | 1.58        | 8.08        |
| <i>o</i> -phthalic acid       | 0.73        | 7.84        |
| <i>m</i> -phthalic acid       | 1.66        | 7.84        |
| <i>p</i> -phthalic acid       | 2           | 7.84        |
| vanillic acid                 | 1.43        | 7.84        |
| syringic acid                 | 1.04        | 7.95        |

**Table S3.** Aromatic acid concentration in seawater and estimated value  $K_{SSA}$ .

|                               | Aromatic acid concentration in seawater (ng L <sup>-1</sup> ) |        |      | $K_{SSA}$ (pg $\mu\text{g}^{-1}$ ) |        |       |
|-------------------------------|---------------------------------------------------------------|--------|------|------------------------------------|--------|-------|
|                               | low                                                           | medium | high | low                                | medium | high  |
| benzoic acid                  | 34                                                            | 205    | 491  | 0.0235                             | 0.142  | 0.304 |
| <i>o</i> -hydroxybenzoic acid | 0.4                                                           | -      | 53.3 | 0.0002                             | -      | 0.026 |
| <i>m</i> -hydroxybenzoic acid | -                                                             | -      | -    | -                                  | -      | -     |
| <i>p</i> -hydroxybenzoic acid | 4.58                                                          | 8.66   | 49.9 | 0.004                              | 0.008  | 0.044 |
| <i>o</i> -phthalic acid       | -                                                             | -      | -    | -                                  | -      | -     |
| <i>m</i> -phthalic acid       | -                                                             | -      | -    | -                                  | -      | -     |
| <i>p</i> -phthalic acid       | -                                                             | -      | -    | -                                  | -      | -     |
| vanillic acid                 | 3                                                             | -      | 47   | 0.04                               | -      | 0.623 |
| syringic acid                 | 0.3                                                           | -      | 0.6  | 0.007                              | -      | 0.015 |

**Table S4.** Estimated annual global aromatic acids emission (tons yr<sup>-1</sup>) via SSA.

|                               |        | SSA emission based on Textor et al. (2006) (10 <sup>12</sup> kg yr <sup>-1</sup> ) |      |      | SSA emission based on Jonas et al. (2021) (10 <sup>12</sup> kg yr <sup>-1</sup> ) |      |      |
|-------------------------------|--------|------------------------------------------------------------------------------------|------|------|-----------------------------------------------------------------------------------|------|------|
|                               |        | 3.65                                                                               | 6.25 | 9.7  | 3.65                                                                              | 4.98 | 6.62 |
|                               |        | Global aromatic acids emission (tons yr <sup>-1</sup> )                            |      |      |                                                                                   |      |      |
| benzoic acid                  | low    | 27                                                                                 | 45   | 71   | 27                                                                                | 36   | 48   |
| benzoic acid                  | medium | 161                                                                                | 275  | 427  | 161                                                                               | 219  | 291  |
| benzoic acid                  | high   | 344                                                                                | 589  | 914  | 344                                                                               | 496  | 624  |
| <i>o</i> -hydroxybenzoic acid | low    | 0.2                                                                                | 0.4  | 0.6  | 0.2                                                                               | 0.3  | 0.4  |
| <i>o</i> -hydroxybenzoic acid | medium | -                                                                                  | -    | -    | -                                                                                 | -    | -    |
| <i>o</i> -hydroxybenzoic acid | high   | 29                                                                                 | 50   | 78   | 29                                                                                | 40   | 53   |
| <i>p</i> -hydroxybenzoic acid | low    | 4                                                                                  | 8    | 12   | 4                                                                                 | 6    | 8    |
| <i>p</i> -hydroxybenzoic acid | medium | 9                                                                                  | 15   | 24   | 9                                                                                 | 12   | 16   |
| <i>p</i> -hydroxybenzoic acid | high   | 50                                                                                 | 85   | 132  | 50                                                                                | 68   | 90   |
| vanillic acid                 | low    | 45                                                                                 | 77   | 120  | 45                                                                                | 62   | 82   |
| vanillic acid                 | medium | -                                                                                  | -    | -    | -                                                                                 | -    | -    |
| vanillic acid                 | high   | 705                                                                                | 1207 | 1873 | 705                                                                               | 962  | 1278 |
| syringic acid                 | low    | 8                                                                                  | 14   | 21   | 8                                                                                 | 11   | 14   |
| syringic acid                 | medium | -                                                                                  | -    | -    | -                                                                                 | -    | -    |
| syringic acid                 | high   | 17                                                                                 | 29   | 45   | 17                                                                                | 23   | 31   |

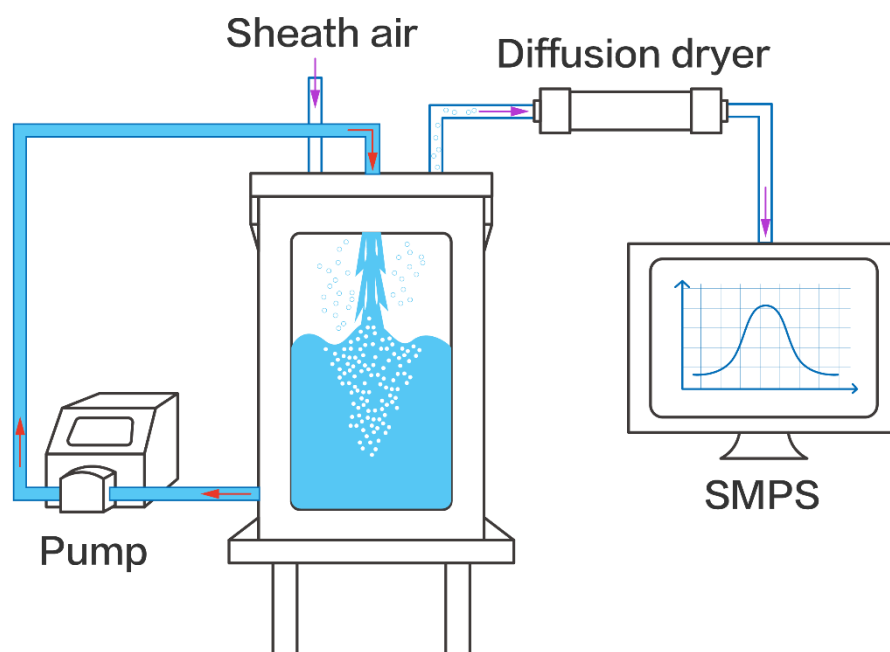

**Fig. S1.** Schematic picture of the plunging jet-sea spray aerosol generator. The red arrows represent the flow direction of seawater, and the purple arrows represent the flow of gases and aerosols.

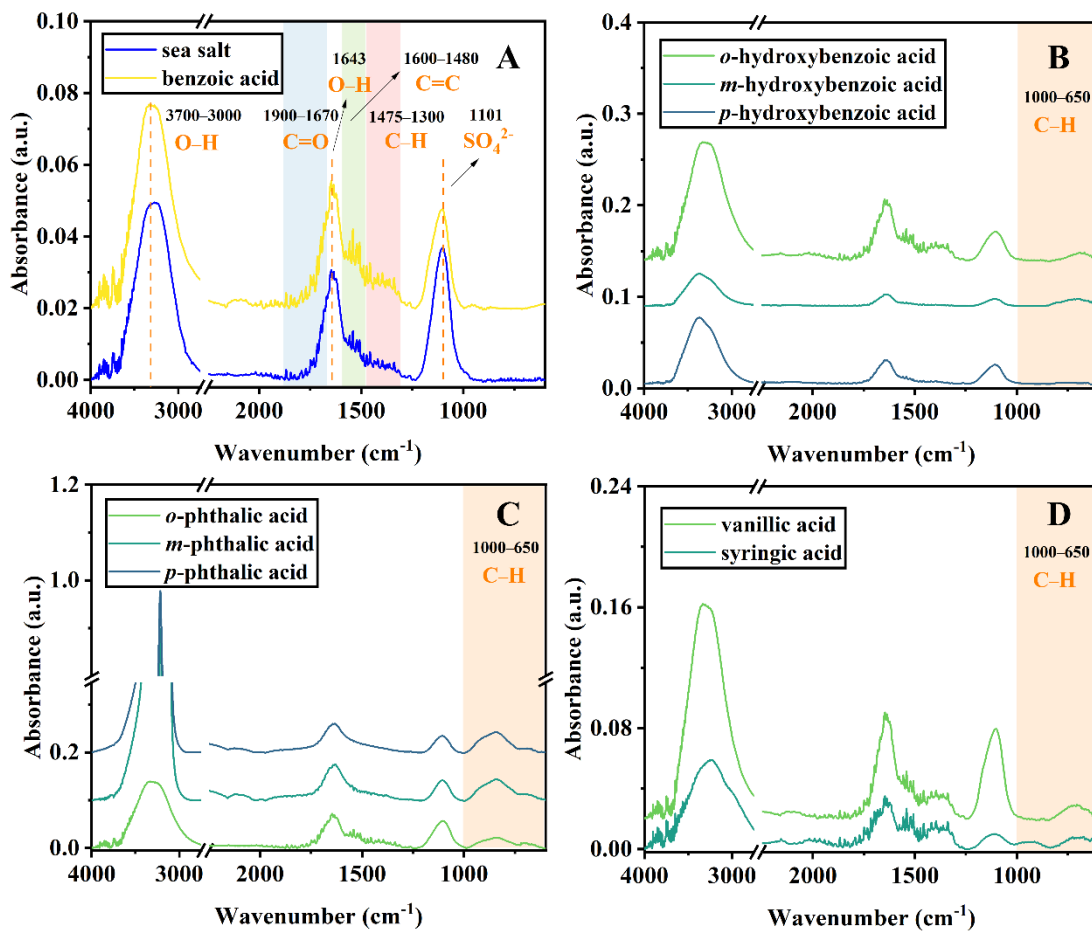

**Fig. S2.** Infrared spectra of aromatic acids-containing sea spray aerosol particles generated from SSA generation chamber. The ATR-FTIR data from the 2750–2250  $\text{cm}^{-1}$  region, where  $\text{CO}_2$  peaks are present, were not shown for clarity.
